# Supplementary material
Source: PubMed Central journal article supplement (PMC8010332)
Supplement: NIHMS1681921-supplement-Supplementary_Table_1.pdf [file NIHMS1681921-supplement-Supplementary_Table_1.pdf]

Supplemental Table 1. Actinobacterial hosts and their phages

| Genus                       | Species                  | # strains           | # phages | # seq phages |
|-----------------------------|--------------------------|---------------------|----------|--------------|
| <i>Actinoplanes</i>         | <i>Actinoplanes sp.</i>  | 1                   | 1        | 1            |
| <i>Arthrobacter</i>         | <i>A. atrocyaneus</i>    | 1                   | 8        | 3            |
|                             | <i>A. globiformis</i>    | 1                   | 108      | 54           |
|                             | <i>Arthrobacter sp.</i>  | 1                   | 596      | 210          |
|                             | <i>A. sulfureus</i>      | 1                   | 3        | 3            |
| <i>Brevibacterium</i>       | <i>B. fuscum</i>         | 1                   | 3        | 1            |
|                             | <i>B. iodinum</i>        | 1                   | 1        | 1            |
| <i>Corynebacterium</i>      | <i>C. flavescens</i>     | 1                   | 1        | 1            |
|                             | <i>C. glutamicum</i>     | 2                   | 6        | 0            |
|                             | <i>C. vitaeruminis</i>   | 1                   | 26       | 11           |
|                             | <i>C. xerosis</i>        | 1                   | 22       | 9            |
| <i>Dietzia</i>              | <i>D. maris</i>          | 1                   | 2        | 0            |
| <i>Gordonia</i>             | <i>G. alkanivorans</i>   | 1                   | 1        | 1            |
|                             | <i>G. lacunae</i>        | 1                   | 2        | 0            |
|                             | <i>G. malaquae</i>       | 3                   | 8        | 7            |
|                             | <i>G. neofelifaecis</i>  | 1                   | 8        | 3            |
|                             | <i>G. rubripincta</i>    | 2                   | 85       | 32           |
|                             | <i>Gordonia sp.</i>      | 1                   | 5        | 3            |
|                             | <i>G. sputi</i>          | 1                   | 1        | 1            |
|                             | <i>G. terrae</i>         | 5                   | 1480     | 333          |
|                             | <i>G. westfalica</i>     | 1                   | 3        | 2            |
|                             | <i>Microbacterium</i>    | <i>M. aerolatum</i> | 1        | 12           |
| <i>M. foliorum</i>          |                          | 1                   | 1494     | 187          |
| <i>M. hominis</i>           |                          | 1                   | 2        | 0            |
| <i>M. liquefaciens</i>      |                          | 1                   | 2        | 2            |
| <i>M. natoriense</i>        |                          | 1                   | 1        | 1            |
| <i>M. nematophilum</i>      |                          | 1                   | 1        | 1            |
| <i>M. paraoxydans</i>       |                          | 2                   | 169      | 34           |
| <i>M. terrae</i>            |                          | 1                   | 9        | 0            |
| <i>M. testaceum</i>         |                          | 1                   | 3        | 1            |
| <i>Mycobacterium</i>        |                          | <i>M. abscessus</i> | 2        | 2            |
|                             | <i>M. aichiense</i>      | 1                   | 1        | 1            |
|                             | <i>M. aurum</i>          | 1                   | 5        | 0            |
|                             | <i>M. avium</i>          | 7                   | 8        | 7            |
|                             | <i>M. phlei</i>          | 2                   | 8        | 8            |
|                             | <i>M. smegmatis</i>      | 1                   | 10525    | 1777         |
| <i>Propionibacterium</i>    | <i>M. tuberculosis</i>   | 1                   | 1        | 1            |
|                             | <i>P. acnes</i>          | 6                   | 47       | 46           |
| <i>Rhodococcus</i>          | <i>P. freudenreichii</i> | 5                   | 9        | 9            |
|                             | <i>R. equi</i>           | 6                   | 8        | 8            |
|                             | <i>R. erythropolis</i>   | 3                   | 112      | 45           |
|                             | <i>R. globerulus</i>     | 1                   | 2        | 1            |
| <i>Rothia</i>               | <i>R. rhodochrous</i>    | 1                   | 1        | 1            |
|                             | <i>R. dentocariosa</i>   | 1                   | 1        | 1            |
| <i>Streptomyces</i>         | <i>S. antibioticus</i>   | 1                   | 2        | 0            |
|                             | <i>S. aureofaciens</i>   | 1                   | 1        | 1            |
|                             | <i>S. avermitilis</i>    | 2                   | 3        | 3            |
|                             | <i>S. azureus</i>        | 1                   | 7        | 5            |
|                             | <i>S. bicolor</i>        | 1                   | 1        | 0            |
|                             | <i>S. coelicolor</i>     | 1                   | 5        | 5            |
|                             | <i>S. flavovirens</i>    | 1                   | 3        | 0            |
|                             | <i>S. griseofuscus</i>   | 1                   | 24       | 12           |
|                             | <i>S. griseus</i>        | 1                   | 290      | 87           |
|                             | <i>S. himastatinicus</i> | 1                   | 1        | 1            |
|                             | <i>S. indigocolor</i>    | 1                   | 3        | 0            |
|                             | <i>S. lividans</i>       | 1                   | 49       | 23           |
|                             | <i>S. mirabilis</i>      | 1                   | 33       | 4            |
|                             | <i>S. platensis</i>      | 1                   | 88       | 9            |
|                             | <i>S. roseosporus</i>    | 1                   | 1        | 1            |
|                             | <i>S. sanglieri</i>      | 1                   | 26       | 3            |
|                             | <i>S. scabiei</i>        | 1                   | 58       | 14           |
|                             | <i>Streptomyces spp.</i> | 4                   | 6        | 4            |
|                             | <i>S. toxytricini</i>    | 1                   | 12       | 4            |
|                             | <i>S. tricolor</i>       | 1                   | 3        | 1            |
| <i>S. venezuelae</i>        | 3                        | 44                  | 16       |              |
| <i>S. virginiae</i>         | 1                        | 1                   | 1        |              |
| <i>S. viridochromogenes</i> | 1                        | 18                  | 4        |              |
| <i>S. xanthochromogenes</i> | 1                        | 45                  | 19       |              |
| <i>Tetrasphaera</i>         | <i>T. jenkinsii</i>      | 1                   | 2        | 1            |
| <i>Tsukamurella</i>         | <i>T. paurometabola</i>  | 2                   | 2        | 2            |
